# Supplementary material for: Targeting of RET oncogene by naphthalene diimide-mediated gene promoter G-quadruplex stabilization exerts anti-tumor activity in oncogene-addicted human medullary thyroid cancer
Source: PubMed Central journal article supplement (PMC5226536; doi:10.18632/oncotarget.10105), 2016-06-16
Supplement: oncotarget-07-49649-s001.pdf [file oncotarget-07-49649-s001.pdf]

# Targeting of *RET* oncogene by naphthalene diimide-mediated gene promoter G-quadruplex stabilization exerts anti-tumor activity in oncogene-addicted human medullary thyroid cancer

## SUPPLEMENTARY MATERIALS AND METHODS

### Transfection experiments

Transient transfection of RET encoding vectors was carried out according to standard procedures. Briefly, wild-type and MEN2A (C634R)-associated RET pRc/CMV constructs were obtained as previously described [38]. Twenty-four (MCF-7) or 72 (TT) h after seeding in a 6-well plate, cells ( $0.3 \times 10^6$  cells/well) were transiently transfected with 2.5  $\mu\text{g}$ /well of pRC/

CMV plasmid (Thermo Fisher Scientific, Monza, Italy) encoding wild-type or mutant (C634R) protoRET using Lipofectamine® 3000 (Thermo Fischer Scientific) in standard growth medium containing 10% FBS, according to the manufacturer's protocol. Forty-eight hours after transfection, cells were treated with the NDI derivative for 48 and 96 h at a concentration corresponding to the  $\text{IC}_{50}$ . Cells were then collected, counted in a particle counter and subsequently analysed.

## SUPPLEMENTARY FIGURES AND TABLES

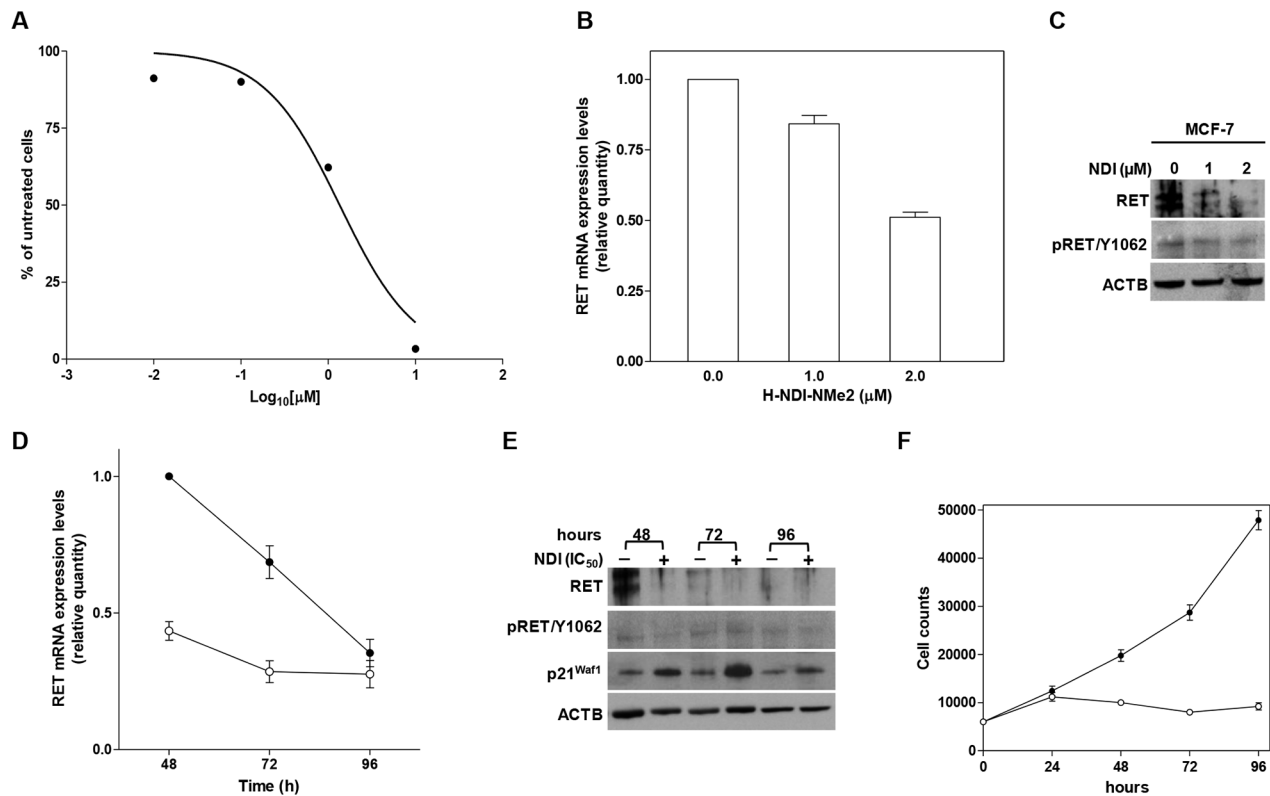

**Supplementary Figure S1: Exposure of MCF-7 breast cancer cells to NDI resulted in the impairment of cell growth and in the down-regulation of RET expression.** **A.** Cell growth inhibition curve obtained upon a 48-h exposure to increasing concentrations ( $\text{Log}_{10}$  [ $\mu\text{M}$ ]) of NDI. Data have been reported as percentage of growing cells in treated vs. untreated cells and represent mean values; **B.** Real-time RT-PCR assessment of RET mRNA expression in MCF-7 cells exposed for 24 h to increasing concentrations of NDI. Quantification of RET mRNA levels was carried out according to the  $2^{-\Delta\Delta\text{CT}}$  method [39]. Data have been reported as RET mRNA relative quantity in treated vs. untreated cells and represent mean values  $\pm$  s.d.; **C.** Representative western immunoblotting showing basal and phosphorylated (pRET/Y1062) RET protein amounts in cells exposed for 24 h to the indicated concentrations of NDI.  $\beta$ -actin (ACTB) was used to ensure equal protein loading; **D.** Time-course assessment of RET mRNA expression levels in untreated (●) and NDI-treated (○) cells. Data have been reported as RET mRNA relative amounts in untreated and NDI-treated cells, according to  $2^{-\Delta\text{CT}}$  method [39], and represent mean values  $\pm$  s.d.; **E.** Representative western immunoblotting showing the time-course assessment of basal and phosphorylated (pRET/Y1062) RET as well as of p21<sup>Waf1</sup> protein amounts in untreated and NDI-treated MCF-7 cells; **F.** Time-course evaluation of cell growth in untreated (●) and NDI-treated (○) breast cancer cells. Data have been reported as number (cell counts) of growing cells and represent mean values  $\pm$  s.d..

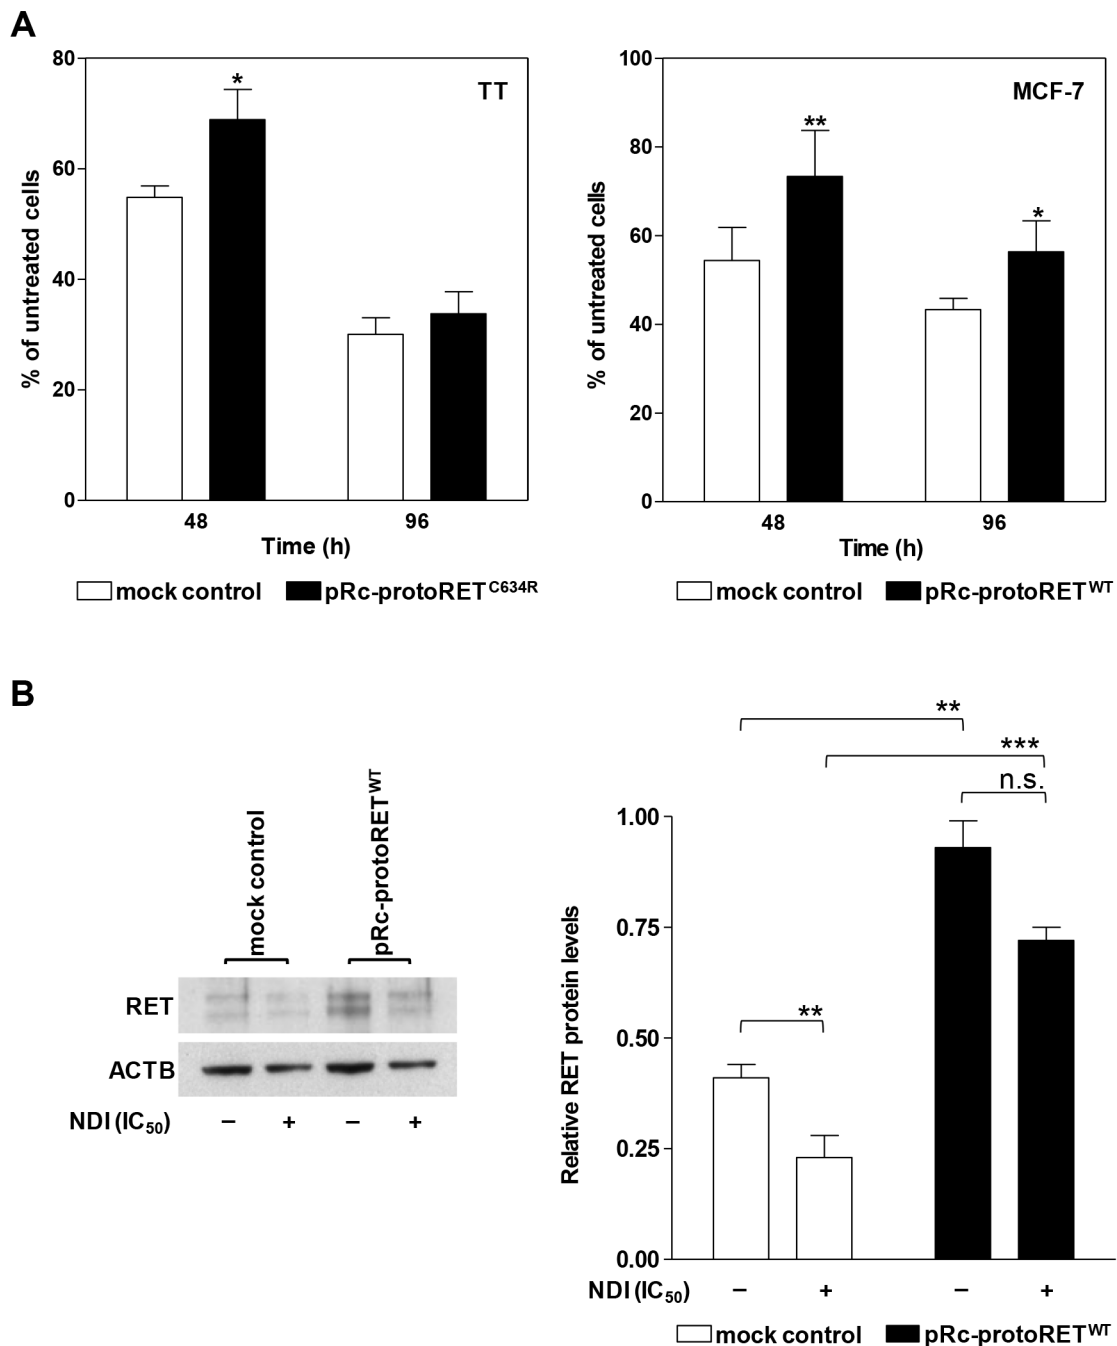

**Supplementary Figure S2: The ectopic expression of RET partially counteracts the growth inhibitory effects of NDI in MTC and BCa cells.** **A.** TT (left panel) and MCF-7 (right panel) cells transfected with empty pRc/CMV vector (mock control) and MEN2A-associated (pRc-protoRET<sup>C634R</sup>) or wild-type (pRc-protoRET<sup>WT</sup>) RET-encoding vectors were exposed for 48 and 96 h to NDI (IC<sub>50</sub>). Data have been reported as percentage of growing cells in NDI-treated vs. untreated cells and represent mean values ± s.d. \**P*<0.05; \*\**P*<0.01; **B.** Representative western immunoblotting showing the expression levels of RET in mock control and pRc-protoRET<sup>WT</sup>-transfected MCF-7 cells in the absence or presence of NDI (IC<sub>50</sub>). β-actin (ACTB) was used to ensure equal protein loading. The quantification of relative RET protein levels in control and pRc-protoRET<sup>WT</sup>-transfected MCF-7 cells has been reported in the graph on the right. Data represent mean values ± s.d. \*\**P*<0.01; \*\*\**P*<0.001.

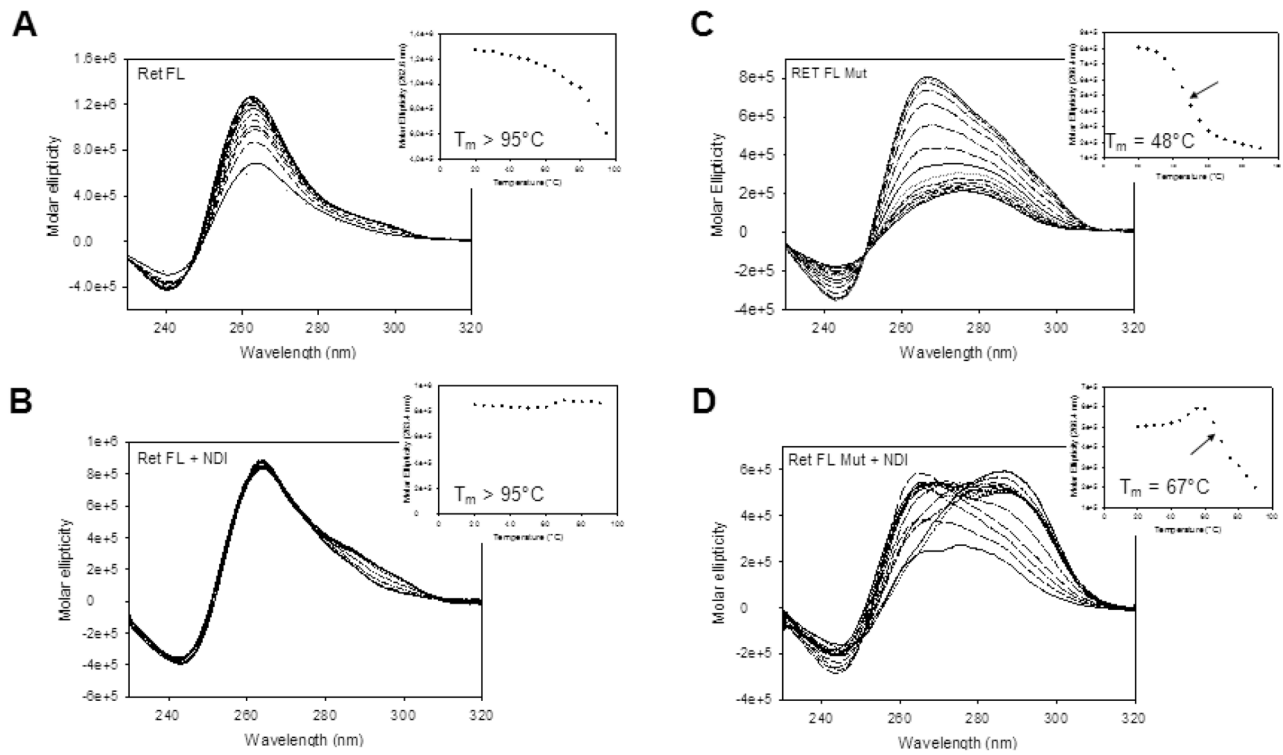

**Supplementary Figure S3: CD thermal unfolding analysis of *RET* promoter G4 sequences.** A. and B. CD spectra of the RET FL oligonucleotide at increasing temperature (25-95 °C) in the absence A) or presence B) of NDI. The insets show molar ellipticity at the indicated wavelength as a function of temperature. C. and D. CD spectra of the RET FL Mut oligonucleotide at increasing temperature (25-95 °C) in the absence C) or presence D) of the NDI. The insets show molar ellipticity at the indicated wavelength as a function of temperature.  $T_m$  values are indicated in the insets.

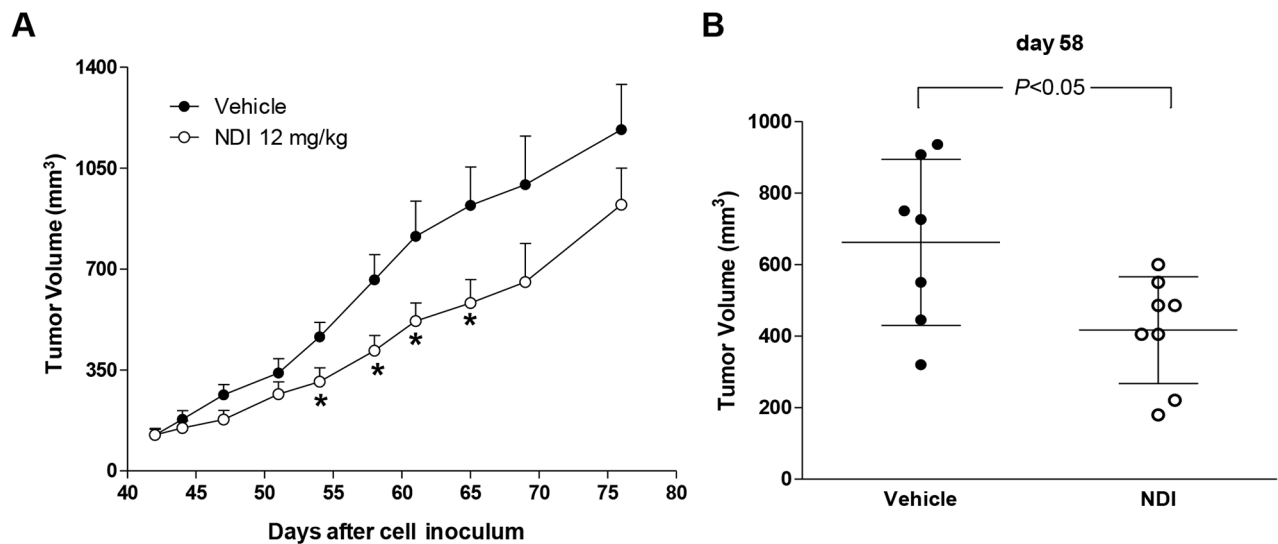

**Supplementary Figure S4: The NDI derivative inhibits MTC tumor growth *in vivo*.** A. Growth curves of TT tumors in vehicle-treated mice (●) and upon i.p. administration of 12 mg/kg NDI derivative (○). Data have been reported as average tumor volume ( $\text{mm}^3$ )  $\pm$  S.E.M. \* $P < 0.05$ . B. Tumor volume distribution in vehicle- and NDI-treated animals at day 58, at which the maximum TVI% was observed.

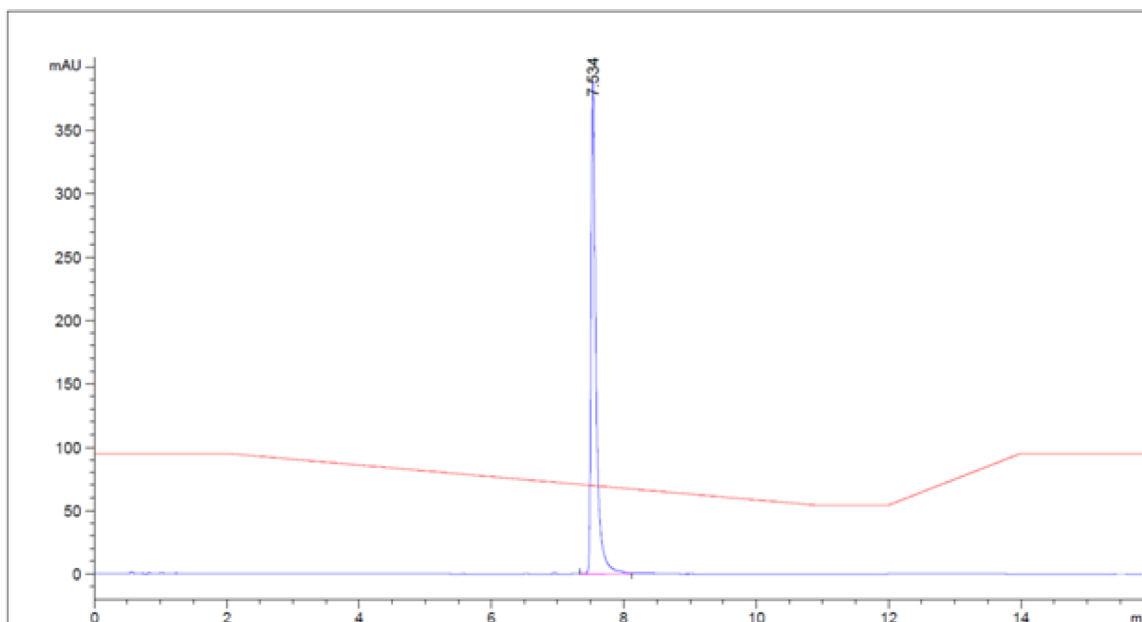

Signal 1: VWD1 A, Wavelength= 256 nm

| Peak #   | RetTime [min] | Type | Width [min] | Area [mAU*s] | Height [mAU] | Area %   |
|----------|---------------|------|-------------|--------------|--------------|----------|
| 1        | 7.534         | VV   | 0.0755      | 2013.92944   | 388.64218    | 100.0000 |
| Totals : |               |      |             | 2013.92944   | 388.64218    |          |

| Time      | % H <sub>2</sub> O TFA 0.1% | % CH <sub>3</sub> CN |
|-----------|-----------------------------|----------------------|
|           | 95                          | 5                    |
| <b>2</b>  | 95                          | 5                    |
| <b>11</b> | 54.5                        | 45.5                 |
| <b>12</b> | 54.5                        | 54.5                 |
| <b>14</b> | 95                          | 5                    |
| <b>16</b> | 95                          | 5                    |

**Supplementary Figure S5: HPLC purity data of the NDI derivative.** The analytical chromatogram of a NDI sample assessed by Method-1 has been reported. HPLC flux 1.0 ml/min.

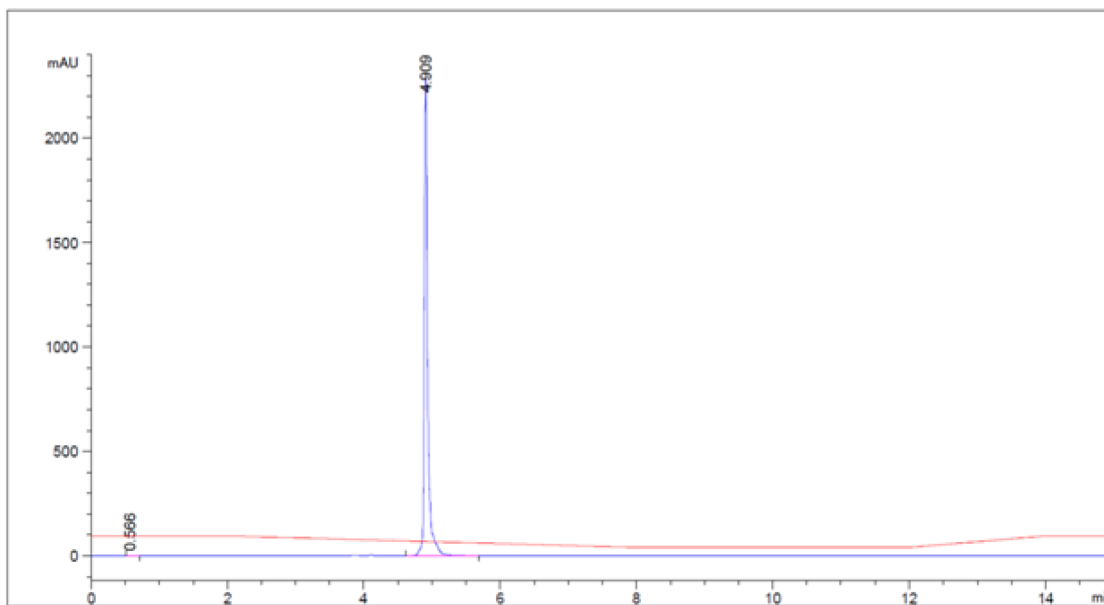

Signal 1: VWD1 A, Wavelength= 256 nm

| Peak # | RetTime [min] | Type | Width [min] | Area [mAU*s] | Height [mAU] | Area %  |
|--------|---------------|------|-------------|--------------|--------------|---------|
| 1      | 0.566         | BB   | 0.0387      | 5.39401      | 2.01595      | 0.0677  |
| 2      | 4.909         | VV   | 0.0521      | 7959.05518   | 2287.87793   | 99.9323 |

Totals : 7959.05518 2287.87793

| Time      | % H <sub>2</sub> O TFA 0.1% | % CH <sub>3</sub> CN |
|-----------|-----------------------------|----------------------|
|           | 95                          | 5                    |
| <b>2</b>  | 95                          | 5                    |
| <b>8</b>  | 40                          | 60                   |
| <b>12</b> | 40                          | 60                   |
| <b>14</b> | 95                          | 5                    |
| <b>16</b> | 95                          | 5                    |

**Supplementary Figure S6: HPLC purity data of the NDI derivative.** The analytical chromatogram of a NDI sample assessed by Method-2 has been reported. HPLC flux 1.4 ml/min.

Supplementary Table S1: Oligonucleotides used in this study

| Application               | Name             | Sequence (5'→3')                                                                                                 |
|---------------------------|------------------|------------------------------------------------------------------------------------------------------------------|
| CD                        | RET FL           | TTTTTGC <b>GGG</b> TAGGGGCGGGGCGGGGCGGGGCGGGTTTTT                                                                |
|                           | RET I-IV         | TTTTTAGGGGCGGGGCGGGGCGGGGCGGGTTTTT                                                                               |
|                           | RET II-V         | TTTTTGC <b>GGG</b> TAGGGGCGGGGCGGGGCTTTTT                                                                        |
|                           | RET FL Mut       | TTTTTGC <b>GGG</b> TAGG <u>I</u> GCGGGGCGG <u>A</u> GCGGGGCGGGTTTTT                                              |
|                           | RET I-IV Mut     | TTTTTAGG <u>I</u> GCGGGGCGG <u>A</u> GCGGGGCGGGTTTTT                                                             |
|                           | RET II-V Mut     | TTTTTGC <b>GGG</b> TAGG <u>I</u> GCGGGGCGG <u>A</u> GCTTTTT                                                      |
|                           | c-Myc            | TGGGGAGGGTGGGGAGGGTGGGGAAGG                                                                                      |
|                           | c-Kit1           | AGGGAGGGCGCTGGGAGGAGGG                                                                                           |
| Taq polymerase stop assay | RET Taq primer   | GGCAAAAAGCAGCTGCTTATATGCAG                                                                                       |
|                           | RET FL Taq       | TTTTTGC <b>GGG</b> TAGGGGCGGGGCGGGGCGGGGCGGGGCGGGTCTGCATATAAGCAGCTGCTTTTTGCC                                     |
|                           | RET I-IV Taq     | TTTTTAGGGGCGGGGCGGGGCGGGGCGGGGCGGGTCTGCATATAAGCAGCTGCTTTTTGCC                                                    |
|                           | RET Mut FL Taq   | TTTTTGC <b>GGG</b> TAGG <u>I</u> GCGGGGCGG <u>A</u> GCGGGGCGGGTCTGCATATAAGCAGCTGCTTTTTGCC                        |
|                           | RET Mut I-IV Taq | TTTTTAGG <u>I</u> GCGGGGCGG <u>A</u> GCGGGGCGGGTCTGCATATAAGCAGCTGCTTTTTGCC                                       |
|                           | Control Taq      | TGTCGTTAAAGTCTGACTGCGAGCTCTCA<br>GATCCTGCATATAAGCAGCTGCTTTTTGCC                                                  |
| Cloning of pGL3-RETmut    | Forward primer   | GTCAGGTACCGCCCTTCCCGCACCCACCCGCCTCCGGCCCCGC<br>CTGGCCACCCCTGGACCGCCCCCGC <u>T</u> CCGCCCGC <u>A</u> CCTACCCGCTCC |
|                           | Reverse primer   | TGACCAAGCTTGTTCCGGGGCACTCAGCGCT                                                                                  |

G-tracts are shown in bold. Mutated bases are underlined.

Supplementary Table S2: Stabilization of the G4s of *RET*, *KIT1* and *MYC* promoters (4  $\mu$ M) by the NDI (4  $\mu$ M) in 10 mM KCl

| Sequence | $\Delta T_m$ ( $^{\circ}$ C) |
|----------|------------------------------|
| RET FL   | 1.3 $\pm$ 0.5                |
| RET I-IV | 1.2 $\pm$ 0.1                |
| RET II-V | 5.6 $\pm$ 0.4                |
| c-Kit1   | 1.5 $\pm$ 0.1                |
| c-Myc    | 3.6 $\pm$ 0.3                |
